# Supplementary material for: Comparison of intestinal expression of the apical sodium‐dependent bile acid transporter between dogs with and without chronic inflammatory enteropathy
Source: PubMed Central journal article supplement — J Vet Intern Med. 2018 Oct 12;32(6):1918–26. doi: 10.1111/jvim.15332 (PMC6271328; doi:10.1111/jvim.15332), 2018-10-12
Supplement: JVIM-32-1918-s001.pdf [file JVIM-32-1918-s001.pdf]

**Supplemental Table 1.** Correlation between ASBT expression, clinical, laboratory, and histopathological findings in dogs with CIE.

Abbreviations: ASBT, apical sodium-dependent bile acid transporter; CIBDAI, canine inflammatory bowel disease activity index; BA, bile acids; [ ], concentration.

**Spearman  $\rho$  correlation coefficient ( $P_{corr}$ )**

| <b>Parameter correlated with</b>               | ASBT protein - ileum | ASBT protein - colon | ASBT mRNA - ileum | ASBT mRNA - colon | CIBDAI score | Serum albumin (g/dL) | Serum cobalamin (ng/L) | Histopathological score - ileum | Histopathological score - colon | Total fecal BA [ ] ( $\mu\text{g}/\text{mg}$ ) | % of fecal primary BA | % of fecal secondary BA | Dysbiosis index    |
|------------------------------------------------|----------------------|----------------------|-------------------|-------------------|--------------|----------------------|------------------------|---------------------------------|---------------------------------|------------------------------------------------|-----------------------|-------------------------|--------------------|
| ASBT protein - colon                           | .15 (.47)            |                      |                   |                   |              |                      |                        |                                 |                                 |                                                |                       |                         |                    |
| ASBT mRNA - ileum                              | <b>.41 (.042)</b>    | -.05 (.79)           |                   |                   |              |                      |                        |                                 |                                 |                                                |                       |                         |                    |
| ASBT mRNA - colon                              | .21 (.32)            | -.12 (.54)           | <b>.48 (.01)</b>  |                   |              |                      |                        |                                 |                                 |                                                |                       |                         |                    |
| CIBDAI score                                   | .27 (.19)            | .21 (.31)            | -.12 (.56)        | .02 (.91)         |              |                      |                        |                                 |                                 |                                                |                       |                         |                    |
| Serum albumin (g/dL)                           | .25 (.24)            | .11 (.60)            | <b>.58 (.003)</b> | .22 (.30)         | -.01 (.94)   |                      |                        |                                 |                                 |                                                |                       |                         |                    |
| Serum cobalamin (ng/L)                         | -.004 (.98)          | -.34 (.29)           | -.02 (.93)        | <b>-.60 (.04)</b> | .06 (.86)    | .37 (.18)            |                        |                                 |                                 |                                                |                       |                         |                    |
| Histopathological score - ileum                | <b>-.40 (.049)</b>   | -.28 (.17)           | -.24 (.25)        | -.28 (.17)        | -.04 (.83)   | -.10 (.63)           | -.01 (.95)             |                                 |                                 |                                                |                       |                         |                    |
| Histopathological score - colon                | -.13 (.51)           | -.12 (.55)           | -.002 (.98)       | -.25 (.22)        | .09 (.67)    | .21 (.32)            | .19 (.49)              | .27 (.20)                       |                                 |                                                |                       |                         |                    |
| Total fecal BA [ ] ( $\mu\text{g}/\text{mg}$ ) | -.51 (.10)           | <b>-.73 (.009)</b>   | -.57 (.06)        | -.32 (.33)        | -.09 (.76)   | .07 (.83)            | .27 (.40)              | .37 (.25)                       | -.03 (.91)                      |                                                |                       |                         |                    |
| % of fecal primary BA                          | -.51 (.10)           | .51 (.10)            | -.05 (.88)        | -.01 (.96)        | -.06 (.84)   | -.07 (.83)           | .02 (.93)              | -.29 (.38)                      | -.18 (.58)                      | -.03 (.91)                                     |                       |                         |                    |
| % of fecal secondary BA                        | -.51 (.10)           | .50 (.10)            | .05 (.88)         | .01 (.96)         | .06 (.84)    | .07 (.83)            | -.02 (.93)             | .29 (.38)                       | .18 (.58)                       | .03 (.91)                                      | <b>-1 (&lt;.001)</b>  |                         |                    |
| Dysbiosis index                                | 0 (1)                | -.44 (.16)           | -.23 (.49)        | -.36 (.27)        | .08 (.80)    | .17 (.62)            | .22 (.50)              | .20 (.54)                       | .32 (.33)                       | .3 (.37)                                       | <b>.65 (.02)</b>      | <b>-.65 (.02)</b>       |                    |
| <i>Clostridium hiranonis</i> log values        | .31 (.34)            | .29 (.37)            | -.31 (.34)        | -.03 (.92)        | -.05 (.87)   | -.05 (.87)           | -.16 (.62)             | .10 (.75)                       | -.002 (.99)                     | .15 (.64)                                      | <b>-.75 (.007)</b>    | <b>.75 (.007)</b>       | <b>-.79 (.003)</b> |

Bold face values indicate  $P < .05$ .
